# Supplementary material for: The Extent of Lifestyle-Induced Weight Loss Determines the Risk of Prediabetes and Metabolic Syndrome Recurrence during a 5-Year Follow-Up
Source: MDPI journal article supplement (doi:10.3390/nu14153060), 2022-07-26
Supplement: s1 [file s1]

# The extent of lifestyle-induced weight loss determines the risk of prediabetes and metabolic syndrome recurrence during a 5-year follow-up

Silke Zimmermann <sup>1\*</sup>, Mandy Vogel <sup>2</sup>, Akash Mathew <sup>1</sup>, Thomas Ebert <sup>3,4</sup>, Rajiv Rana <sup>1</sup>, Shihai Jiang <sup>1</sup>, Berend Isermann <sup>1</sup> and Ronald Biemann <sup>1\*</sup>

<sup>1</sup>Institute of Laboratory Medicine, Clinical Chemistry and Molecular Diagnostics, University of Leipzig, 04103 Leipzig, Germany

<sup>2</sup>Hospital for Children and Adolescents, Centre for Pediatric Research, Department Woman and Child Health, University of Leipzig, Leipzig, Germany

<sup>3</sup>Karolinska Institutet, Department of Clinical Science, Intervention and Technology, Division of Renal Medicine, SE-141 86 Stockholm, Sweden

<sup>4</sup>Medical Department III – Endocrinology, Nephrology, Rheumatology, University of Leipzig Medical Center, Leipzig, Germany

\*Correspondence: ronald.biemann@medizin.uni-leipzig.de (RB); silke.zimmermann@medizin.uni-leipzig.de (SZ)

## Supplementary Materials:

**Supplementary Table S1: Clinical parameters of individuals with metabolic syndrome at baseline and after the 6-month lifestyle-induced weight loss intervention period.** Data are presented as median (interquartile range). Wilcoxon Signed-Rank Test was used to analyze differences of paired samples between baseline (BL) and lifestyle-induced weight loss in each quartile (Q1-Q4).

| Parameters               | BL         | Q1           | <i>p</i> | BL          | Q2          | <i>p</i> | BL         | Q3          | <i>p</i> | BL           | Q4          | <i>p</i> |
|--------------------------|------------|--------------|----------|-------------|-------------|----------|------------|-------------|----------|--------------|-------------|----------|
| Age [years]              | 47.5 ± 9   |              |          | 48 ± 6      |             |          | 49 ± 5     |             |          | 47.5 ± 10.3  |             |          |
| BMI                      | 32.9 ± 6.6 | 30.9 ± 7.3   | <0.01    | 33.0 ± 5.7  | 28.8 ± 4.9  | <0.01    | 35.4 ± 3.4 | 30.0 ± 3.5  | <0.01    | 35.2 ± 3.2   | 27.5 ± 5.1  | <0.01    |
| Weight [kg]              | 106.2 ± 28 | 100.1 ± 27.6 | <0.01    | 107 ± 21.8  | 94.5 ± 18.2 | <0.01    | 108 ± 15.9 | 93.5 ± 14.5 | <0.01    | 109.8 ± 20   | 12.7 ± 15.3 | <0.01    |
| HDL cholesterol [mmol/L] | 1.41 ± 0.7 | 1.53 ± 0.8   | n.s.     | 1.2 ± 0.4   | 1.33 ± 0.4  | <0.01    | 1.23 ± 0.4 | 1.45 ± 0.6  | <0.01    | 1.46 ± 0.4   | 1.46 ± 0.4  | <0.01    |
| TG [mmol/L]              | 2.19 ± 2.2 | 2.16 ± 2.8   | n.s.     | 2.0 ± 2.6   | 1.36 ± 0.8  | <0.01    | 2.03 ± 1.9 | 1.4 ± 0.8   | <0.01    | 1.83 ± 1.5   | 0.98 ± 0.4  | <0.01    |
| RR <sub>sys</sub> [mmHg] | 140 ± 12   | 138 ± 16.0   | n.s.     | 138 ± 14.0  | 122 ± 13.0  | <0.01    | 140 ± 28.5 | 130 ± 14.0  | n.s.     | 149.0 ± 18.0 | 130 ± 18.0  | 0.02     |
| HbA1c [%]                | 5.6 ± 0.5  | 5.5 ± 0.4    | n.s.     | 5.6 ± 0.7   | 5.4 ± 0.3   | n.s.     | 5.4 ± 0.8  | 5.3 ± 0.7   | n.s.     | 5.6 ± 0.5    | 5.2 ± 0.6   | 0.02     |
| Insulin [pmol/L]         | 88 ± 80    | 68 ± 28      | <0.01    | 79.5 ± 72.3 | 45.5 ± 24   | <0.01    | 68 ± 83.3  | 36 ± 43.3   | <0.01    | 60 ± 52      | 30 ± 21     | <0.01    |
| Glucose [mmol/L]         | 5.9 ± 0.8  | 5.8 ± 0.7    | n.s.     | 6.2 ± 1.2   | 5.7 ± 0.6   | 0.02     | 5.9 ± 1.2  | 5.4 ± 0.6   | n.s.     | 6.2 ± 0.9    | 5.6 ± 0.7   | 0.02     |

**Supplementary Table S2.** Table showing the number of participants treated with antilipidemic drugs and total numbers of participants in each quartile (Q1-Q4) at each timepoint. Fisher's exact probability test was used to analyze differences in the number of treated versus nontreated participants at different timepoints (only significant values are listed). BL= baseline; LIWL= lifestyle-induced weight loss; FU1-5= years of follow-up

|     | Q1<br>antilipidemics/<br>total | Q2<br>antilipidemics/<br>total | Q3<br>antilipidemics/<br>total | Q4<br>antilipidemics/<br>total | <i>p</i> |
|-----|--------------------------------|--------------------------------|--------------------------------|--------------------------------|----------|
| BL  | 4/15                           | 5/14                           | 3/14                           | 3/15                           | n.s.     |
| FU1 | 4/11                           | 4/12                           | 4/11                           | 4/14                           | n.s.     |
| FU2 | 4/8                            | 4/11                           | 4/11                           | 4/12                           | n.s.     |
| FU3 | 4/8                            | 4/8                            | 5/10                           | 4/11                           | n.s.     |
| FU4 | 5/6                            | 4/10                           | 4/11                           | 4/12                           | n.s.     |
| FU5 | 4/7                            | 4/9                            | 4/11                           | 4/13                           | n.s.     |

**Supplementary Table S3.** Median and interquartile ranges of RR<sub>dia</sub> levels before and after LIWL and during the 5-year follow-up. The Wilcoxon signed rank test was used to analyze changes between paired samples between BL and subsequent follow-up timepoints (only significant values are listed). BL= baseline; LIWL= lifestyle-induced weight loss; FU1-5= years of follow-up.

| RR <sub>dia</sub> (mmHg) | BL      | Q1        | <i>p</i> | BL      | Q2        | <i>p</i> | BL      | Q3        | <i>p</i> | BL        | Q4         | <i>p</i> |
|--------------------------|---------|-----------|----------|---------|-----------|----------|---------|-----------|----------|-----------|------------|----------|
| LIWL                     | 90 ± 12 | 90 ± 10   | n.s.     | 84 ± 15 | 81 ± 7.3  | n.s.     | 85 ± 13 | 84.5 ± 8  | n.s.     | 91 ± 15.5 | 84.5 ± 9.5 | n.s.     |
| FU1                      |         | 90 ± 23   | n.s.     |         | 84 ± 12   | n.s.     |         | 82 ± 11   | n.s.     |           | 84 ± 12    | n.s.     |
| FU2                      |         | 99 ± 30.8 | n.s.     |         | 85 ± 17.3 | n.s.     |         | 90 ± 13.5 | n.s.     |           | 82 ± 15.5  | n.s.     |
| FU3                      |         | 88 ± 16   | n.s.     |         | 88 ± 12   | n.s.     |         | 85 ± 17.5 | n.s.     |           | 86 ± 9     | n.s.     |
| FU4                      |         | 88 ± 21   | n.s.     |         | 85 ± 18   | n.s.     |         | 90 ± 18.3 | n.s.     |           | 86 ± 19    | n.s.     |
| FU5                      |         | 85 ± 8    | n.s.     |         | 89 ± 11.8 | n.s.     |         | 85 ± 10   | n.s.     |           | 81 ± 11.8  | <0.01    |

**Supplementary Table S4.** Table showing the number of participants treated with antihypertensive medication (AHM) and total numbers of participants in each quartile (Q1-Q4) at each timepoint. Fisher's exact probability test was used to analyze differences in the number of treated versus nontreated participants at different timepoints (only significant values are listed). BL= baseline; LIWL= lifestyle-induced weight loss; FU1-5= years of follow-up

|     | Q1<br>AHM/<br>total | Q2<br>AHM/<br>total | Q3<br>AHM/<br>total | Q4<br>AHM/<br>total | <i>p</i> |
|-----|---------------------|---------------------|---------------------|---------------------|----------|
| BL  | 11/15               | 11/14               | 13/14               | 12/15               | n.s.     |
| FU1 | 10/11               | 9/12                | 7/11                | 6/14                | n.s.     |
| FU2 | 5/8                 | 10/11               | 9/11                | 6/12                | n.s.     |
| FU3 | 8/8                 | 8/8                 | 9/10                | 6/11                | 0.02     |
| FU4 | 5/6                 | 10/10               | 10/11               | 8/12                | n.s.     |
| FU5 | 6/7                 | 9/9                 | 10/11               | 7/13                | 0.04     |

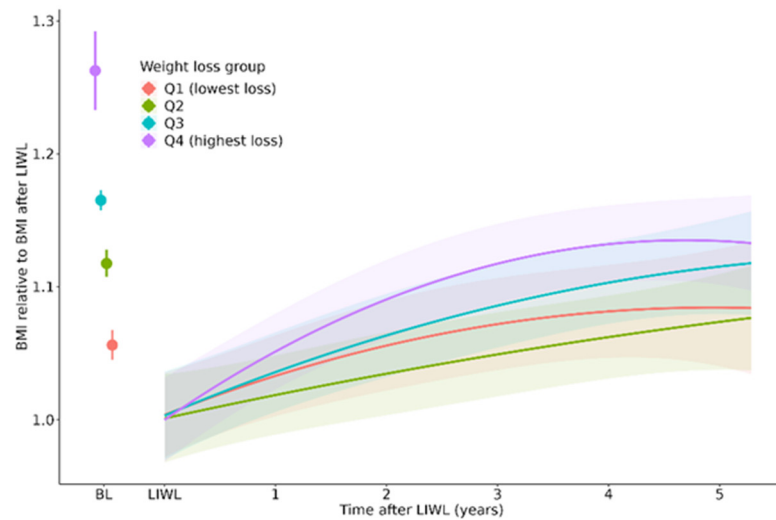

**Supplementary Figure S1.** BMI trends relative to BMI after lifestyle-induced weight loss in weight loss stratified by quartiles Q1-Q4 in a modeled quadratic dependent on time after LIWL. Data are presented as change in BMI since LIWL. BL= baseline; LIWL= lifestyle-induced weight loss; 1-5= years of follow-up

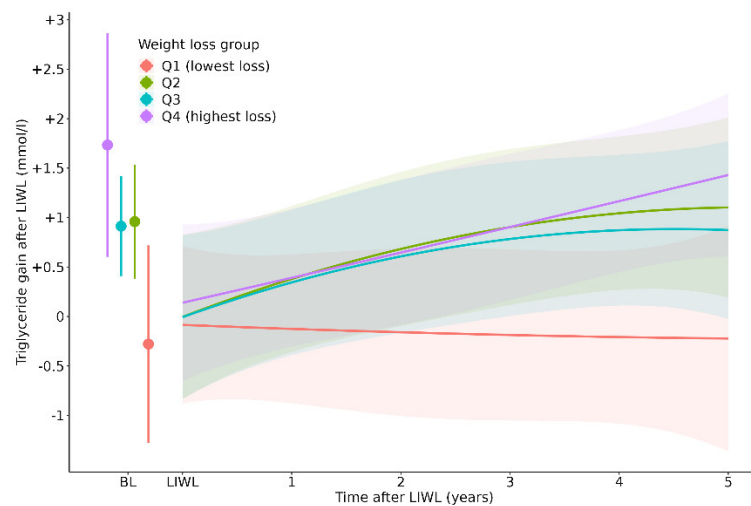

**Supplementary Figure S2.** Triglyceride level trends relative to triglyceride levels after lifestyle-induced weight loss stratified by weight loss quartiles Q1-Q4 in a modeled quadratic dependent on time after LIWL. Data are presented as change in Triglycerides after LIWL. BL= baseline; LIWL= lifestyle-induced weight loss; 1-5= years of follow-up

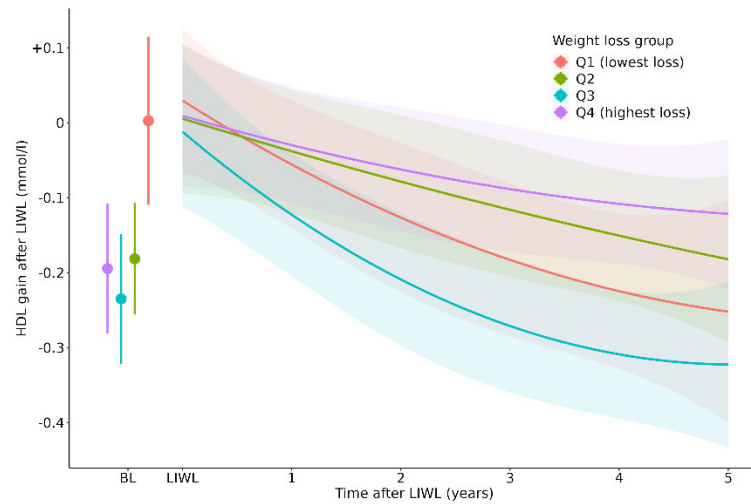

**Supplementary Figure S3.** HDL cholesterol relative to HDL cholesterol after lifestyle-induced weight loss stratified by weight loss quartiles Q1-Q4 in a modeled quadratic dependent on time after LIWL. Data are presented as change in HDL cholesterol after LIWL. BL= baseline; LIWL= lifestyle-induced weight loss; 1-5= years of follow-up

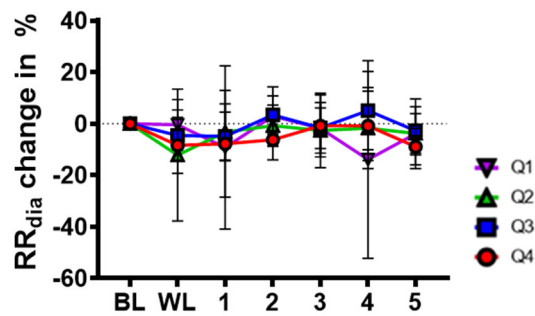

**Supplementary Figure S4:** Long-term effects of lifestyle-induced weight loss on diastolic blood pressure during the 5-year follow-up. Data are presented as the median (interquartile range). BL= baseline; WL= weight loss; 1-5= years of follow-up.

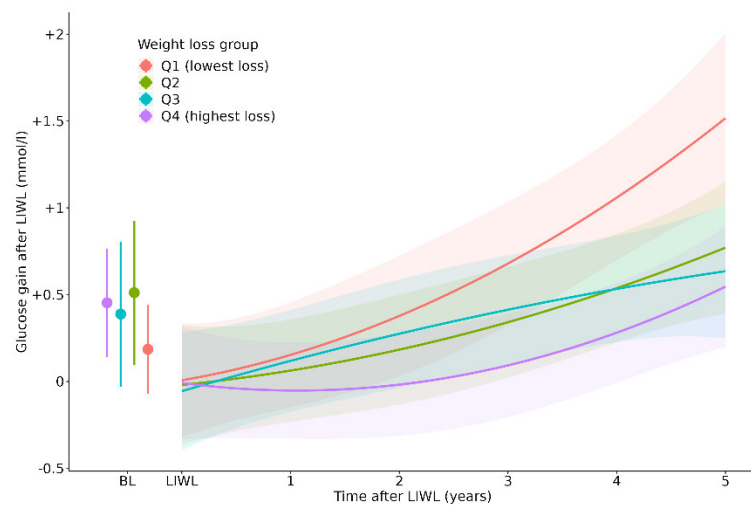

**Supplementary Figure S5.** Fasting plasma glucose relative to fasting plasma glucose after lifestyle-induced weight loss stratified by weight loss quartiles Q1-

Q4 in a modeled quadratic dependent on time after LIWL. Data are presented as change in fasting plasma glucose after LIWL. BL= baseline; LIWL= lifestyle-induced weight loss; 1-5= years of follow-up
